# Supplementary material
Source: Springer Nature journal article supplement (https://www.springermedizin.de/resource/supplementary/12943_2012_1098_MOESM5_ESM.pdf/9552480)

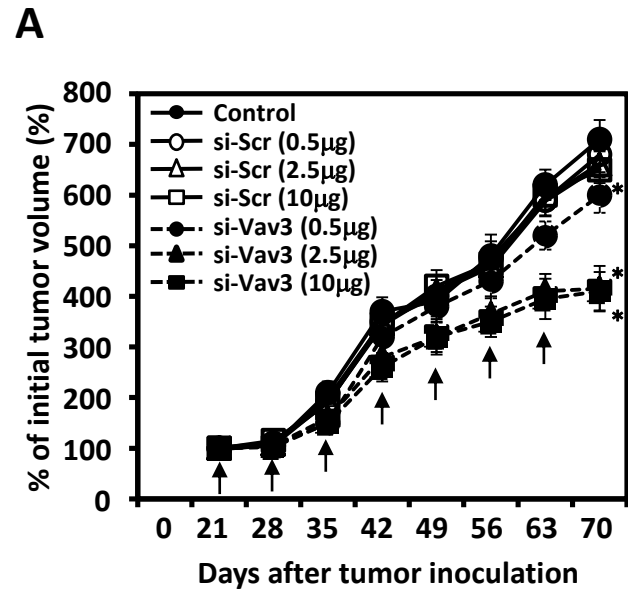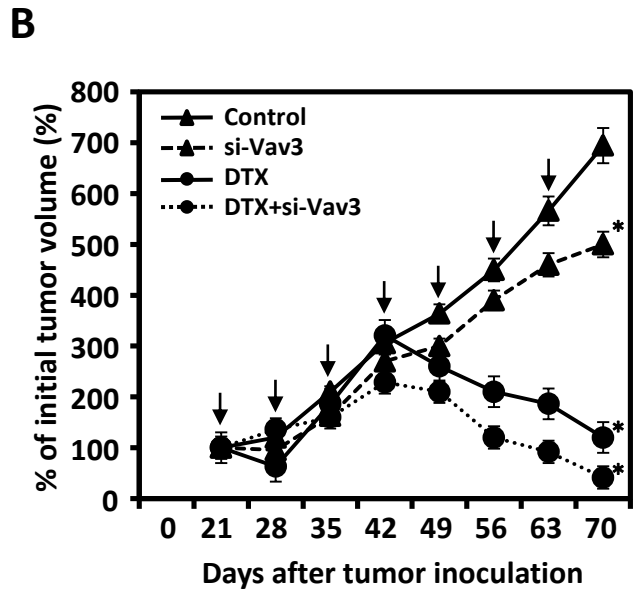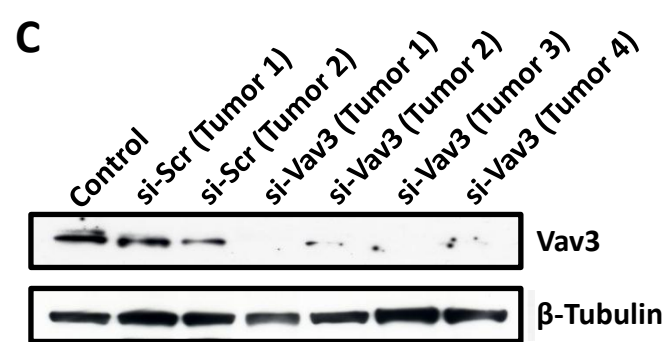

**E**

|             | Ki-67(%)    | pAR (%)    | Apoptosis (%) |
|-------------|-------------|------------|---------------|
| Control     | 82 $\pm$ 10 | 91 $\pm$ 3 | 0.4 $\pm$ 0.1 |
| si-Vav3     | 42 $\pm$ 8  | 45 $\pm$ 9 | 8 $\pm$ 5     |
| DTX         | 11 $\pm$ 5  | 89 $\pm$ 8 | 24 $\pm$ 8    |
| DTX+si-Vav3 | 7 $\pm$ 3   | 43 $\pm$ 9 | 35 $\pm$ 9    |

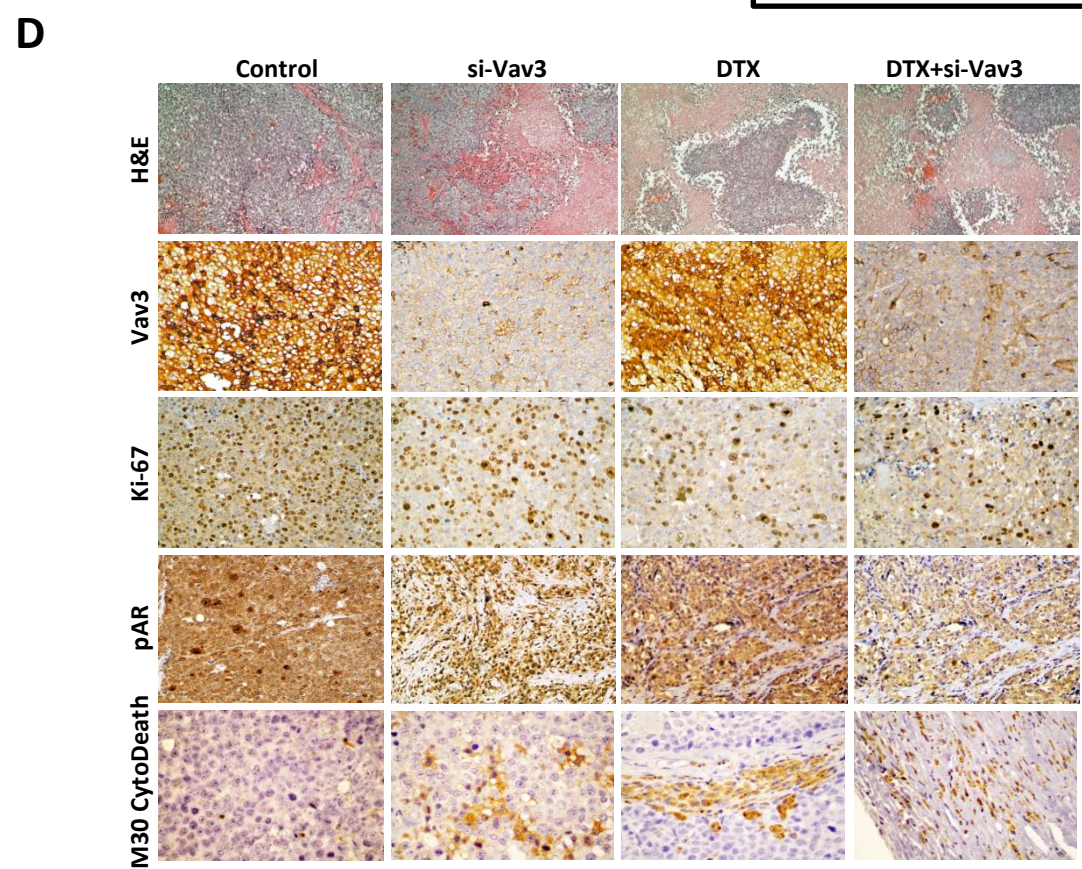

Supplement: MOESM5 [file 9552480]
